# Supplementary material for: Greenhouse gases modulate the strength of millennial-scale subtropical rainfall, consistent with future predictions
Source: Copernicus journal article supplement (doi:10.5194/cp-2021-188), 2022-01-17
Supplement: Supplementary file 1 [file cp-2021-188-supplement.pdf]

Supporting Information for

**Greenhouse gases modulate the strength of millennial-scale  
subtropical rainfall, consistent with future predictions**

Fei Guo<sup>1,2,3\*</sup>, Steven C. Clemens<sup>2,\*</sup>, Yuming Liu<sup>1,4</sup>, Ting Wang<sup>1,4</sup>, Huimin Fan<sup>1</sup>, Xingxing Liu<sup>1</sup>,  
Youbin Sun<sup>1,5,6</sup>

<sup>1</sup>State Key Laboratory of Loess and Quaternary Geology, Institute of Earth Environment, Chinese Academy of Sciences, Xian 710061, China.

<sup>2</sup>Department of Earth, Environmental, and Planetary Sciences, Brown University, Providence, RI 02912-1846, USA

<sup>3</sup>Institute of Marine Science and Technology, Shandong University, Qingdao 266237, China

<sup>4</sup>University of Chinese Academy of Sciences, Beijing 100049, China

<sup>5</sup>CAS Center for Excellence in Quaternary Science and Global Change, Xian 710061, China.

<sup>6</sup>Open Studio for Oceanic-Continental Climate and Environment Changes, Pilot National Laboratory for Marine Science and Technology (Qingdao), Qingdao 266200, China.

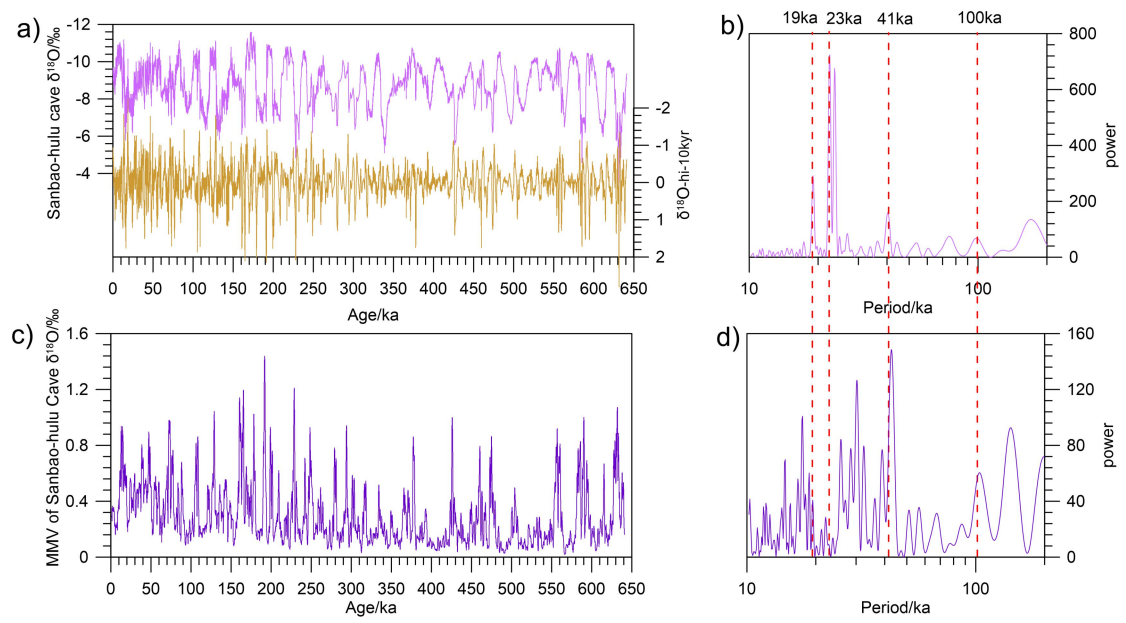

**Figure S1** Raw datasets, millennial-scale components (10kyr high pass filtering signals) and MMV of the speleothem  $\delta^{18}\text{O}$  record over the past 640 ka with their corresponding spectra. The orbital bands are marked with red dashed lines (eccentricity-100 kyr, obliquity-41 kyr, precession-23 kyr and 19 kyr).

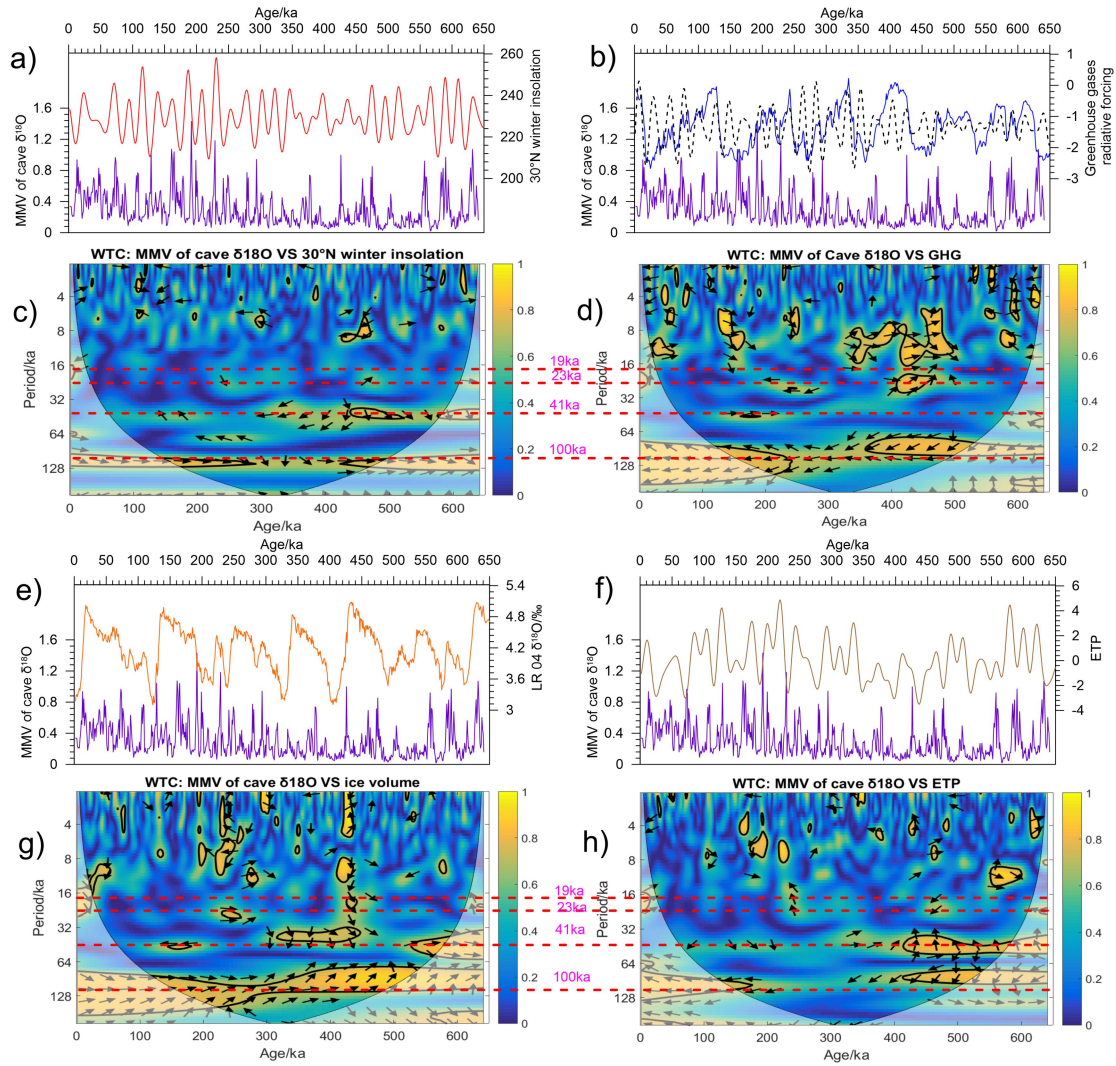

**Figure S2** Comparison of a) 30°N winter insolation, b) GHG radiative forcing (black dash line donates the precession band-pass filtering results of  $\Delta RF_{GHG}$ ), e) ice volume and f) ETP forcing for MMV of speleothem  $\delta^{18}O$ ; Wavelet coherence between c) 30°N winter insolation, d) GHG radiative forcing, g) ice volume, h) ETP and MMV of speleothem  $\delta^{18}O$  over the past 640 ka. The orbital bands are marked with red dashed lines (eccentricity-100 kyr, obliquity-41 kyr, precession-23 kyr and 19 kyr). The black outlines denote coefficients of determination greater than 0.76. The black arrows represent the phase relationship with rightward, upward and downward arrows indicating in-phase, leading and lagging phase, respectively. Strong ice volume, GHG and winter insolation modulation at 100 kyr band, relative weak ice volume and winter insolation forcing at the 41 kyr band as well as unclear precession band modulation are observed for MMV of speleothem  $\delta^{18}O$ .
